# Supplementary material for: Utilization of Torrefied and Non-Torrefied Short Rotation Willow in Wood–Plastic Composites
Source: MDPI journal article supplement (doi:10.3390/polym15193997), 2023-10-05
Supplement: s1 [file s1]

Table S1: Results of the Tukey HSD comparisons between pairs for tensile modulus of elasticity with difference between the pairs, 95 % confident interval and p-value.

| <b>Tensile modulus of elasticity</b> |                   |                                 |            |                   |
|--------------------------------------|-------------------|---------------------------------|------------|-------------------|
| <i>Sample</i>                        | <i>difference</i> | <i>95 % confidence interval</i> |            | <i>p adjusted</i> |
| MB-MA                                | 81                | -104                            | 267        | 0.869             |
| MC-MA                                | 90                | -95                             | 275        | 0.794             |
| MD-MA                                | -43               | -228                            | 142        | 0.997             |
| ME-MA                                | 140               | -45                             | 325        | 0.268             |
| MF-MA                                | 95                | -90                             | 280        | 0.745             |
| MG-MA                                | 25                | -160                            | 211        | 1.000             |
| MH-MA                                | 60                | -125                            | 245        | 0.974             |
| MI-MA                                | 62                | -123                            | 247        | 0.969             |
| MC-MB                                | 9                 | -166                            | 183        | 1.000             |
| MD-MB                                | -124              | -299                            | 50         | 0.340             |
| ME-MB                                | 59                | -116                            | 233        | 0.969             |
| MF-MB                                | 14                | -161                            | 188        | 1.000             |
| MG-MB                                | -56               | -231                            | 119        | 0.976             |
| MH-MB                                | -21               | -196                            | 153        | 1.000             |
| MI-MB                                | -19               | -194                            | 155        | 1.000             |
| MD-MC                                | -133              | -308                            | 41         | 0.258             |
| ME-MC                                | 50                | -125                            | 224        | 0.989             |
| MF-MC                                | 5                 | -170                            | 179        | 1.000             |
| MG-MC                                | -65               | -239                            | 110        | 0.945             |
| MH-MC                                | -30               | -204                            | 145        | 1.000             |
| MI-MC                                | -28               | -202                            | 147        | 1.000             |
| <b>ME-MD</b>                         | <b>183</b>        | <b>8</b>                        | <b>357</b> | <b>0.034</b>      |
| MF-MD                                | 138               | -37                             | 313        | 0.219             |
| MG-MD                                | 68                | -106                            | 243        | 0.927             |
| MH-MD                                | 103               | -71                             | 278        | 0.585             |
| MI-MD                                | 105               | -69                             | 280        | 0.560             |
| MF-ME                                | -45               | -220                            | 130        | 0.994             |
| MG-ME                                | -115              | -289                            | 60         | 0.447             |
| MH-ME                                | -80               | -254                            | 95         | 0.844             |
| MI-ME                                | -78               | -252                            | 97         | 0.861             |
| MG-MF                                | -70               | -244                            | 105        | 0.919             |
| MH-MF                                | -35               | -209                            | 140        | 0.999             |
| MI-MF                                | -33               | -207                            | 142        | 0.999             |
| MH-MG                                | 35                | -140                            | 209        | 0.999             |
| MI-MG                                | 37                | -138                            | 211        | 0.999             |
| MI-MH                                | 2                 | -173                            | 177        | 1.000             |

Table S2: Results of the Tukey HSD comparisons between pairs for tensile strength with difference between the pairs, 95 % confident interval and p-value.

| <b>Tensile strength</b> |                   |                                 |     |                   |
|-------------------------|-------------------|---------------------------------|-----|-------------------|
| <i>Sample</i>           | <i>difference</i> | <i>95 % confidence interval</i> |     | <i>p adjusted</i> |
| MB-MA                   | 0.8               | -1.2                            | 2.8 | 0.929             |
| MC-MA                   | 0.5               | -1.6                            | 2.5 | 0.996             |
| MD-MA                   | -0.9              | -2.9                            | 1.1 | 0.873             |
| ME-MA                   | 0.3               | -1.8                            | 2.3 | 1.000             |
| MF-MA                   | 0.8               | -1.2                            | 2.9 | 0.913             |
| MG-MA                   | -0.2              | -2.3                            | 1.8 | 1.000             |
| MH-MA                   | -0.2              | -2.3                            | 1.8 | 1.000             |
| MI-MA                   | 0.2               | -1.8                            | 2.2 | 1.000             |
| MC-MB                   | -0.3              | -2.2                            | 1.6 | 1.000             |
| MD-MB                   | -1.7              | -3.6                            | 0.2 | 0.125             |
| ME-MB                   | -0.5              | -2.4                            | 1.4 | 0.992             |
| MF-MB                   | 0.0               | -1.9                            | 2.0 | 1.000             |
| MG-MB                   | -1.0              | -2.9                            | 0.9 | 0.706             |
| MH-MB                   | -1.0              | -2.9                            | 0.9 | 0.707             |
| MI-MB                   | -0.6              | -2.5                            | 1.3 | 0.982             |
| MD-MC                   | -1.4              | -3.3                            | 0.5 | 0.332             |
| ME-MC                   | -0.2              | -2.1                            | 1.7 | 1.000             |
| MF-MC                   | 0.3               | -1.6                            | 2.3 | 1.000             |
| MG-MC                   | -0.7              | -2.6                            | 1.2 | 0.943             |
| MH-MC                   | -0.7              | -2.6                            | 1.2 | 0.943             |
| MI-MC                   | -0.3              | -2.2                            | 1.6 | 1.000             |
| ME-MD                   | 1.2               | -0.8                            | 3.1 | 0.552             |
| MF-MD                   | 1.7               | -0.2                            | 3.6 | 0.111             |
| MG-MD                   | 0.7               | -1.3                            | 2.6 | 0.965             |
| MH-MD                   | 0.7               | -1.3                            | 2.6 | 0.964             |
| MI-MD                   | 1.1               | -0.8                            | 3.0 | 0.630             |
| MF-ME                   | 0.6               | -1.4                            | 2.5 | 0.988             |
| MG-ME                   | -0.5              | -2.4                            | 1.4 | 0.993             |
| MH-ME                   | -0.5              | -2.4                            | 1.4 | 0.993             |
| MI-ME                   | -0.1              | -2.0                            | 1.9 | 1.000             |
| MG-MF                   | -1.1              | -3.0                            | 0.9 | 0.672             |
| MH-MF                   | -1.1              | -3.0                            | 0.9 | 0.673             |
| MI-MF                   | -0.6              | -2.5                            | 1.3 | 0.975             |
| MH-MG                   | 0.0               | -1.9                            | 1.9 | 1.000             |
| MI-MG                   | 0.4               | -1.5                            | 2.4 | 0.998             |
| MI-MH                   | 0.4               | -1.5                            | 2.4 | 0.998             |

Table S3: Results of the Tukey HSD comparisons between pairs for Flexural modulus of elasticity with difference between the pairs, 95 % confident interval and p-value.

| <b>Flexural modulus of elasticity</b> |                   |                                 |            |                   |
|---------------------------------------|-------------------|---------------------------------|------------|-------------------|
| <i>Sample</i>                         | <i>difference</i> | <i>95 % confidence interval</i> |            | <i>p adjusted</i> |
| MB-MA                                 | -95               | -241                            | 51         | 0.500             |
| <b>MC-MA</b>                          | <b>-173</b>       | <b>-319</b>                     | <b>-27</b> | <b>0.009</b>      |
| MD-MA                                 | -114              | -260                            | 32         | 0.254             |
| ME-MA                                 | -51               | -197                            | 95         | 0.971             |
| <b>MF-MA</b>                          | <b>-174</b>       | <b>-320</b>                     | <b>-28</b> | <b>0.008</b>      |
| <b>MG-MA</b>                          | <b>-231</b>       | <b>-377</b>                     | <b>-85</b> | <b>0.000</b>      |
| <b>MH-MA</b>                          | <b>-200</b>       | <b>-351</b>                     | <b>-50</b> | <b>0.002</b>      |
| <b>MI-MA</b>                          | <b>-155</b>       | <b>-301</b>                     | <b>-9</b>  | <b>0.029</b>      |
| MC-MB                                 | -78               | -224                            | 68         | 0.744             |
| MD-MB                                 | -19               | -165                            | 127        | 1.000             |
| ME-MB                                 | 44                | -102                            | 190        | 0.988             |
| MF-MB                                 | -79               | -225                            | 67         | 0.731             |
| MG-MB                                 | -136              | -282                            | 10         | 0.089             |
| MH-MB                                 | -105              | -256                            | 45         | 0.393             |
| MI-MB                                 | -60               | -206                            | 86         | 0.926             |
| MD-MC                                 | 59                | -87                             | 205        | 0.932             |
| ME-MC                                 | 122               | -24                             | 268        | 0.179             |
| MF-MC                                 | -1                | -147                            | 145        | 1.000             |
| MG-MC                                 | -58               | -204                            | 88         | 0.938             |
| MH-MC                                 | -27               | -178                            | 123        | 1.000             |
| MI-MC                                 | 18                | -128                            | 164        | 1.000             |
| ME-MD                                 | 63                | -83                             | 209        | 0.904             |
| MF-MD                                 | -60               | -206                            | 86         | 0.926             |
| MG-MD                                 | -117              | -263                            | 29         | 0.224             |
| MH-MD                                 | -86               | -237                            | 64         | 0.661             |
| MI-MD                                 | -41               | -187                            | 105        | 0.993             |
| MF-ME                                 | -123              | -269                            | 23         | 0.171             |
| <b>MG-ME</b>                          | <b>-180</b>       | <b>-326</b>                     | <b>-34</b> | <b>0.005</b>      |
| MH-ME                                 | -149              | -300                            | 1          | 0.053             |
| MI-ME                                 | -104              | -250                            | 42         | 0.374             |
| MG-MF                                 | -57               | -203                            | 89         | 0.944             |
| <b>MH-MF</b>                          | <b>-26</b>        | <b>-177</b>                     | <b>124</b> | <b>1.000</b>      |
| MI-MF                                 | 19                | -127                            | 165        | 1.000             |
| MH-MG                                 | 31                | -120                            | 181        | 0.999             |
| MI-MG                                 | 76                | -70                             | 222        | 0.770             |

Table S4: Results of the Tukey HSD comparisons between pairs for Flexural strength with difference between the pairs, 95 % confident interval and p-value.

| <b>Flexural strength</b> |                   |                                 |             |                   |
|--------------------------|-------------------|---------------------------------|-------------|-------------------|
| <i>Sample</i>            | <i>difference</i> | <i>95 % confidence interval</i> |             | <i>p adjusted</i> |
| MB-MA                    | <b>-3.6</b>       | <b>-6.5</b>                     | <b>-0.7</b> | <b>0.005</b>      |
| <b>MC-MA</b>             | <b>-3.1</b>       | <b>-6.0</b>                     | <b>-0.2</b> | <b>0.026</b>      |
| MD-MA                    | -2.6              | -5.5                            | 0.3         | 0.112             |
| ME-MA                    | -2.2              | -5.1                            | 0.7         | 0.308             |
| <b>MF-MA</b>             | -1.6              | -4.5                            | 1.3         | 0.714             |
| <b>MG-MA</b>             | <b>-3.3</b>       | <b>-6.2</b>                     | <b>-0.4</b> | <b>0.013</b>      |
| <b>MH-MA</b>             | <b>-4.6</b>       | <b>-7.6</b>                     | <b>-1.6</b> | <b>0.000</b>      |
| <b>MI-MA</b>             | <b>-3.9</b>       | <b>-6.8</b>                     | <b>-1.0</b> | <b>0.002</b>      |
| MC-MB                    | 0.5               | -2.4                            | 3.4         | 1.000             |
| MD-MB                    | 1.0               | -1.9                            | 3.9         | 0.976             |
| ME-MB                    | 1.4               | -1.5                            | 4.3         | 0.821             |
| MF-MB                    | 2.0               | -0.9                            | 4.9         | 0.417             |
| MG-MB                    | 0.3               | -2.6                            | 3.2         | 1.000             |
| MH-MB                    | -1.0              | -4.0                            | 2.0         | 0.977             |
| MI-MB                    | -0.3              | -3.2                            | 2.6         | 1.000             |
| MD-MC                    | 0.5               | -2.4                            | 3.4         | 1.000             |
| ME-MC                    | 0.9               | -2.0                            | 3.8         | 0.981             |
| MF-MC                    | 1.5               | -1.4                            | 4.4         | 0.763             |
| MG-MC                    | -0.2              | -3.1                            | 2.7         | 1.000             |
| MH-MC                    | -1.5              | -4.5                            | 1.5         | 0.811             |
| MI-MC                    | -0.8              | -3.7                            | 2.1         | 0.994             |
| ME-MD                    | 0.4               | -2.5                            | 3.3         | 1.000             |
| MF-MD                    | 1.0               | -1.9                            | 3.9         | 0.970             |
| MG-MD                    | -0.7              | -3.6                            | 2.2         | 0.997             |
| MH-MD                    | -2.0              | -5.0                            | 1.0         | 0.467             |
| MI-MD                    | -1.3              | -4.2                            | 1.6         | 0.888             |
| MF-ME                    | 0.6               | -2.3                            | 3.5         | 0.999             |
| <b>MG-ME</b>             | -1.1              | -4.0                            | 1.8         | 0.940             |
| MH-ME                    | -2.4              | -5.4                            | 0.6         | 0.206             |
| MI-ME                    | -1.7              | -4.6                            | 1.2         | 0.614             |
| MG-MF                    | -1.7              | -4.6                            | 1.2         | 0.621             |
| <b>MH-MF</b>             | <b>-3.0</b>       | <b>-6.0</b>                     | <b>0.0</b>  | <b>0.047</b>      |
| MI-MF                    | -2.3              | -5.2                            | 0.6         | 0.231             |
| MH-MG                    | -1.3              | -4.3                            | 1.7         | 0.907             |
| MI-MG                    | -0.6              | -3.5                            | 2.3         | 0.999             |
